# Supplementary material for: Adaptive immune changes associate with clinical progression of Alzheimer’s disease
Source: PubMed Central journal article supplement (PMC11044380; doi:10.1186/s13024-024-00726-8), 2024-04-24

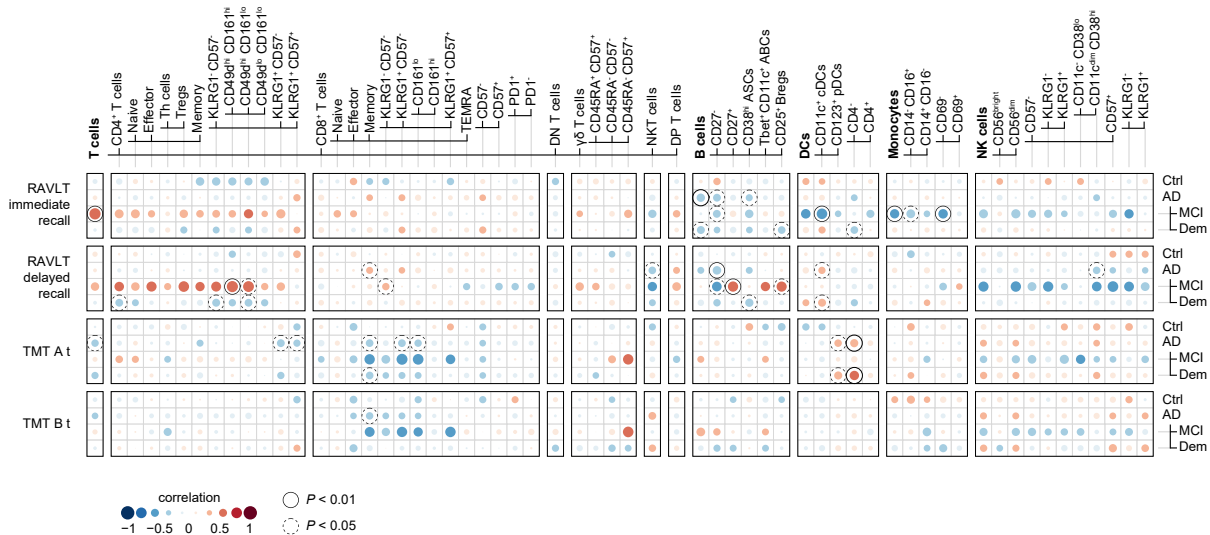

Supplement: 13024_2024_726_MOESM20_ESM.pdf [file 13024_2024_726_MOESM20_ESM.pdf]
